# Supplementary material for: The Role of Bcl-2 and Beclin-1 Complex in “Switching” between Apoptosis and Autophagy in Human Glioma Cells upon LY294002 and Sorafenib Treatment
Source: MDPI journal article supplement (doi:10.3390/cells12232670), 2023-11-21
Supplement: s1 [file s1]

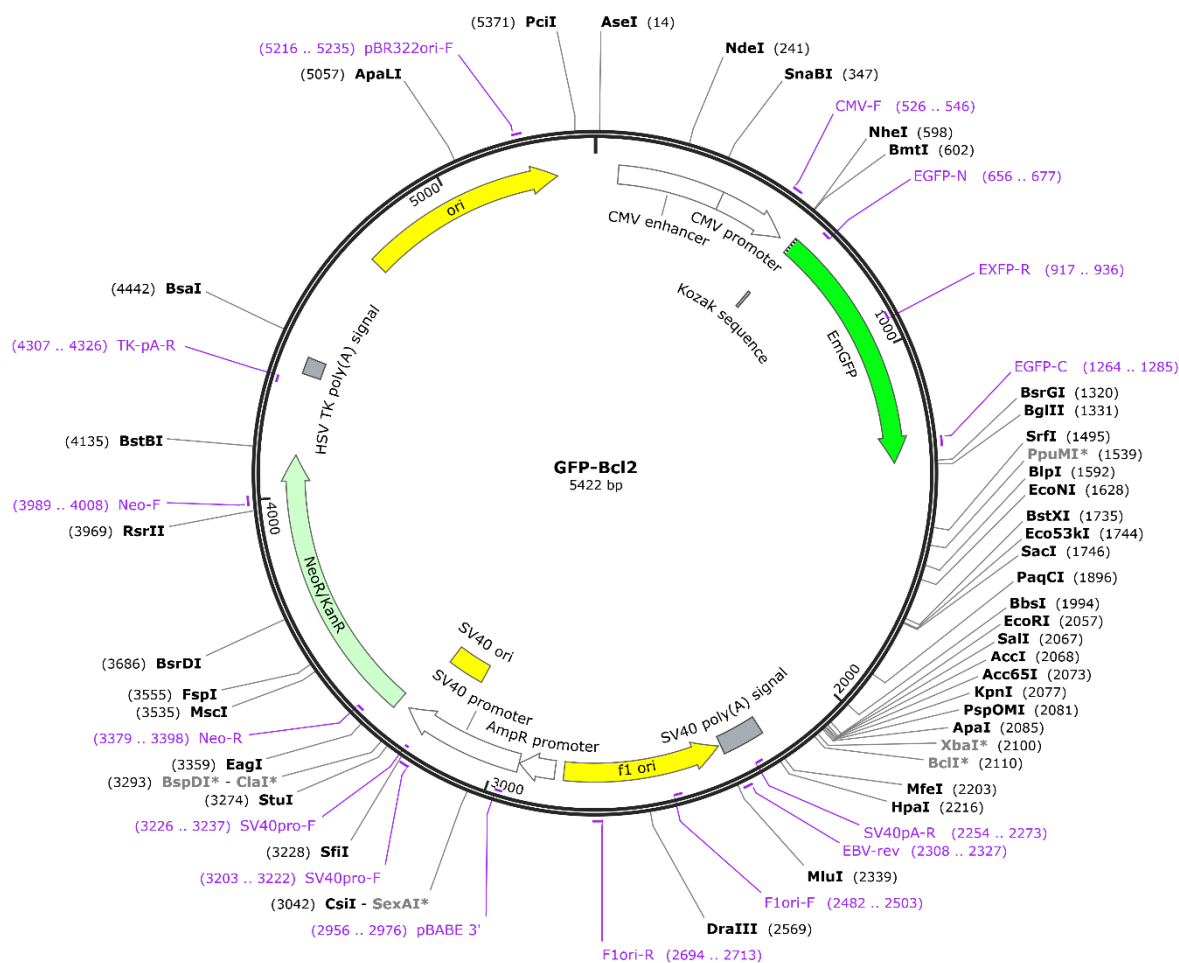

**Fig. 1.** Sequence map of GFP-Bcl2 plasmid used in experiments (AddGene, Watertown, USA).

Forward: 5' - AGA TCT CGA GCT ATG GAA GGC AGC - 3'

Reverse: 5' - GCT GGA TCC TTT GTT ATA AAA CTG - 3'

**Fig. 2.** Sequence of primers for cloning pEGFP-beclin-1 plasmid given from Cambridge University to pmCherryC-beclin-1 plasmid used in experiments.

**A**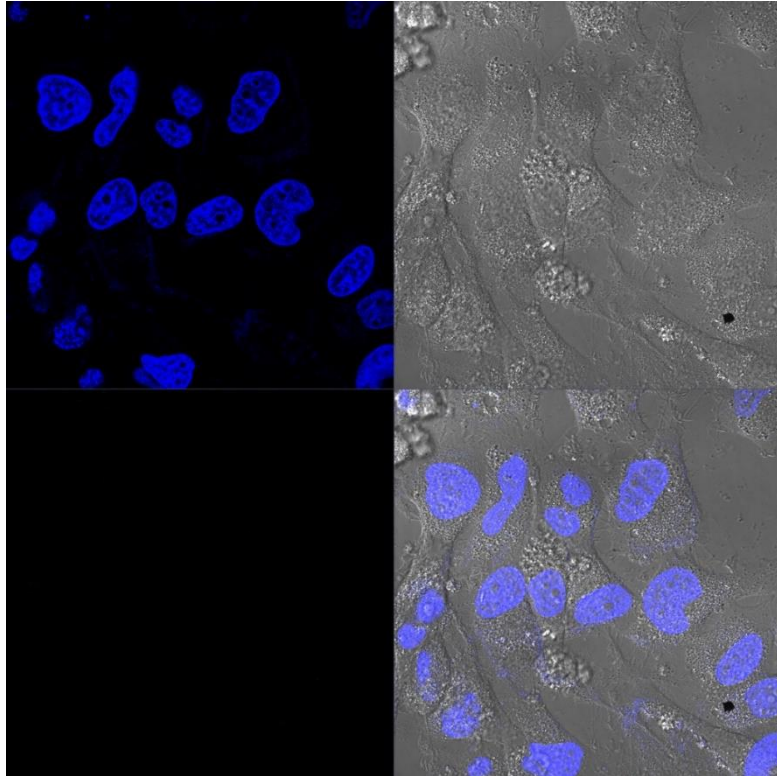**B**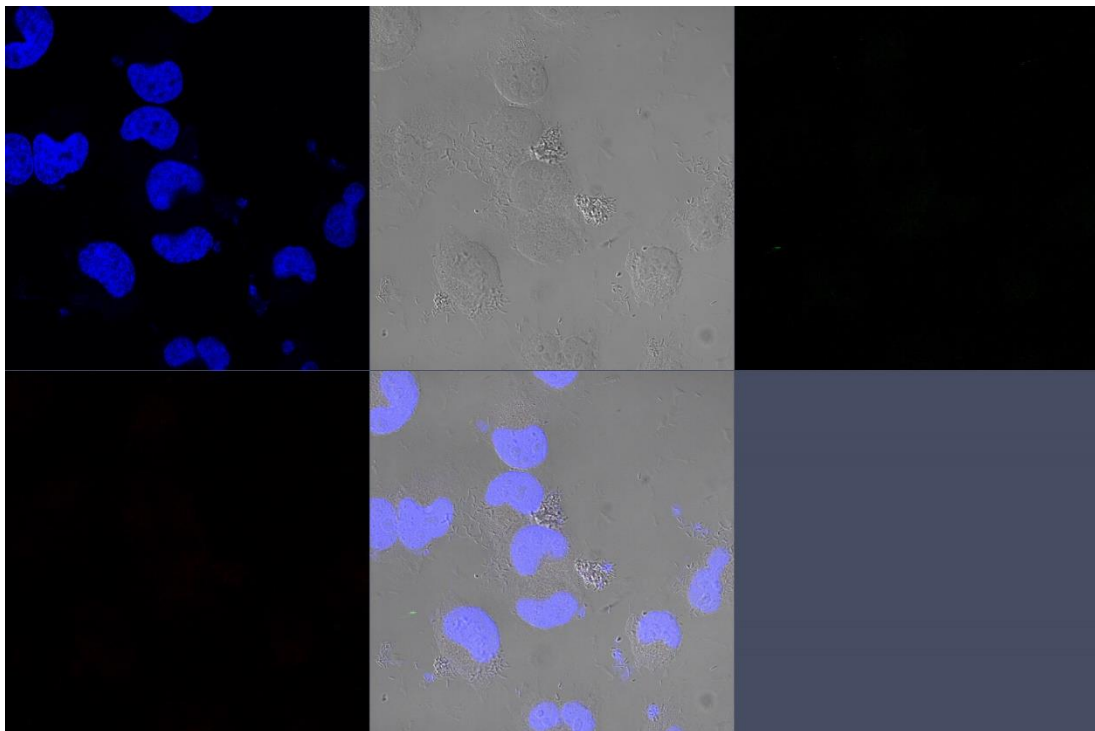

**Fig. 3** Representative photo snapped with the Laser Scanning Confocal Microscopy system LSM780 Zeiss (Oberkochen, Germany) of Hoechst 33342 staining of **A**: Glioblastoma multiforme cells (T98G) treated with lipofectamine only in order to exclude its potential cytotoxicity and **B**: T98G untreated and untransfected cells as a control to exclude potentially autofluorescence.

**A**

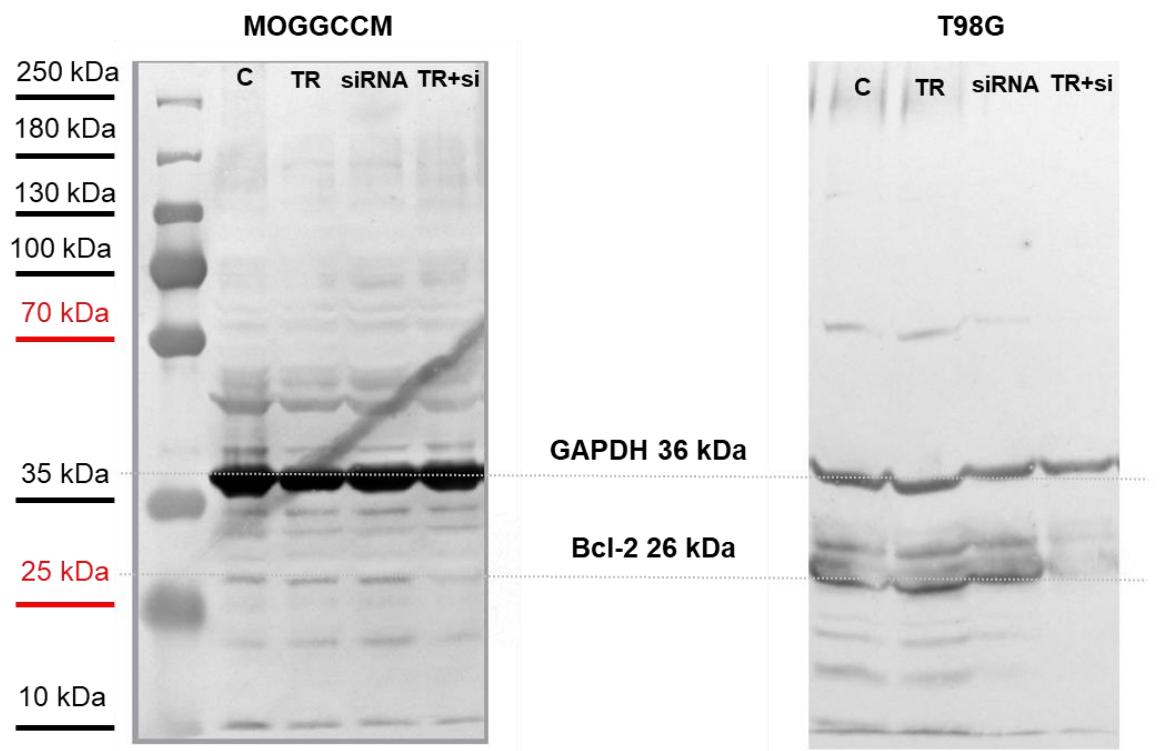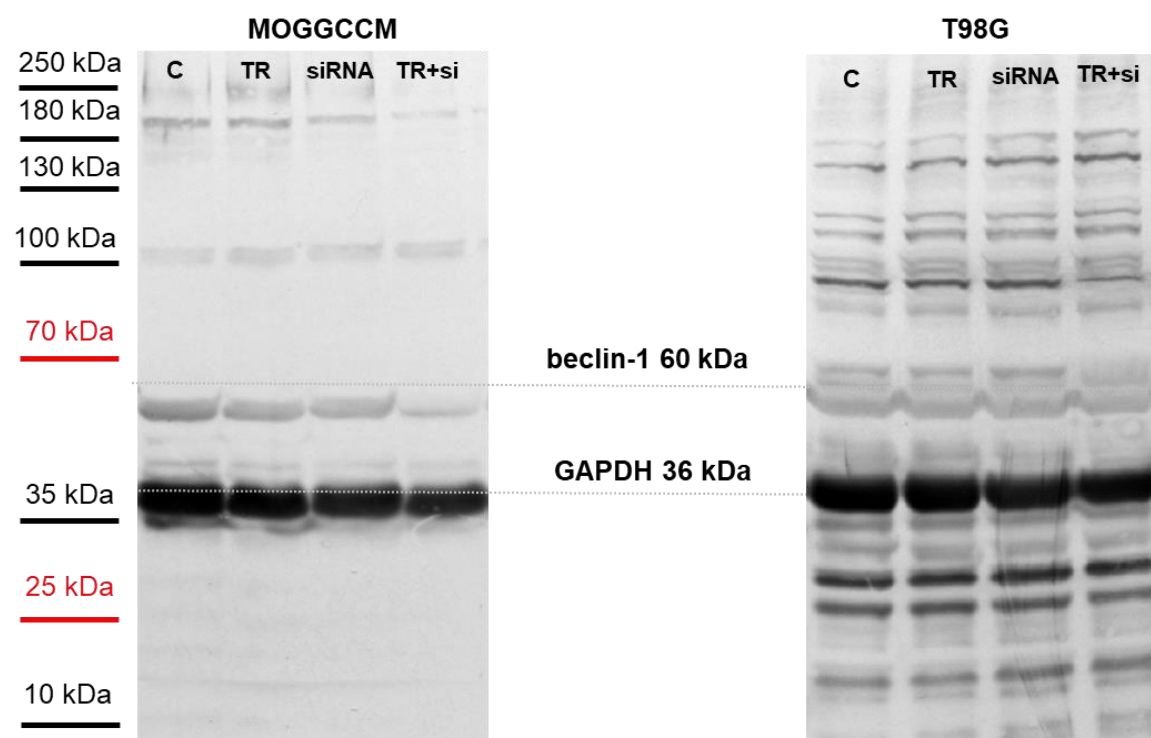

**B**

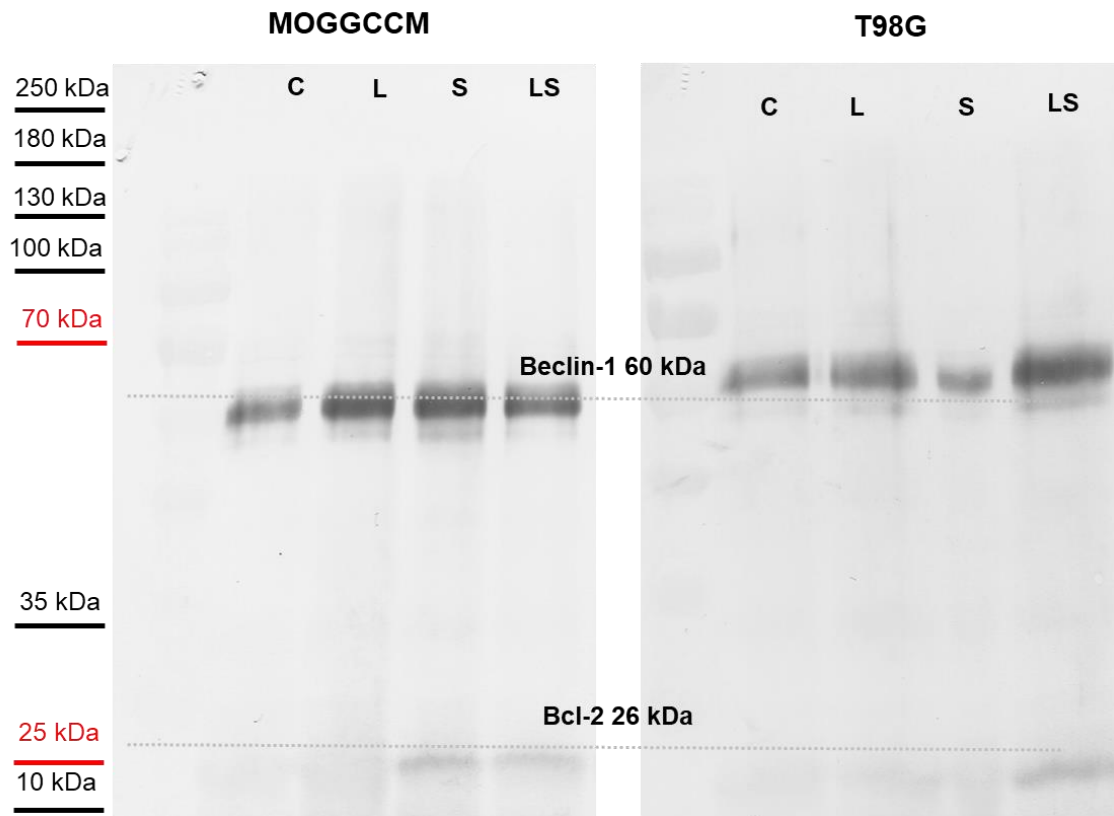

**Fig. 4 A:** Whole immunoblotting membranes showing the Bcl-2 and beclin-1 expression silencing in MOGGCCM and T98G transfected cells. C – control, TR – transfection reagent, siRNA – Bcl-2/beclin-1 expression silencer, TR+si – proper transfection mix; **B:** Whole immunoblotting membranes after co-immunoprecipitation assay showing the Bcl-2 and beclin-1 complex in MOGGCCM and T98G. C – control, L – LY294002, S – sorafenib, LS – LY294002+sorafenib

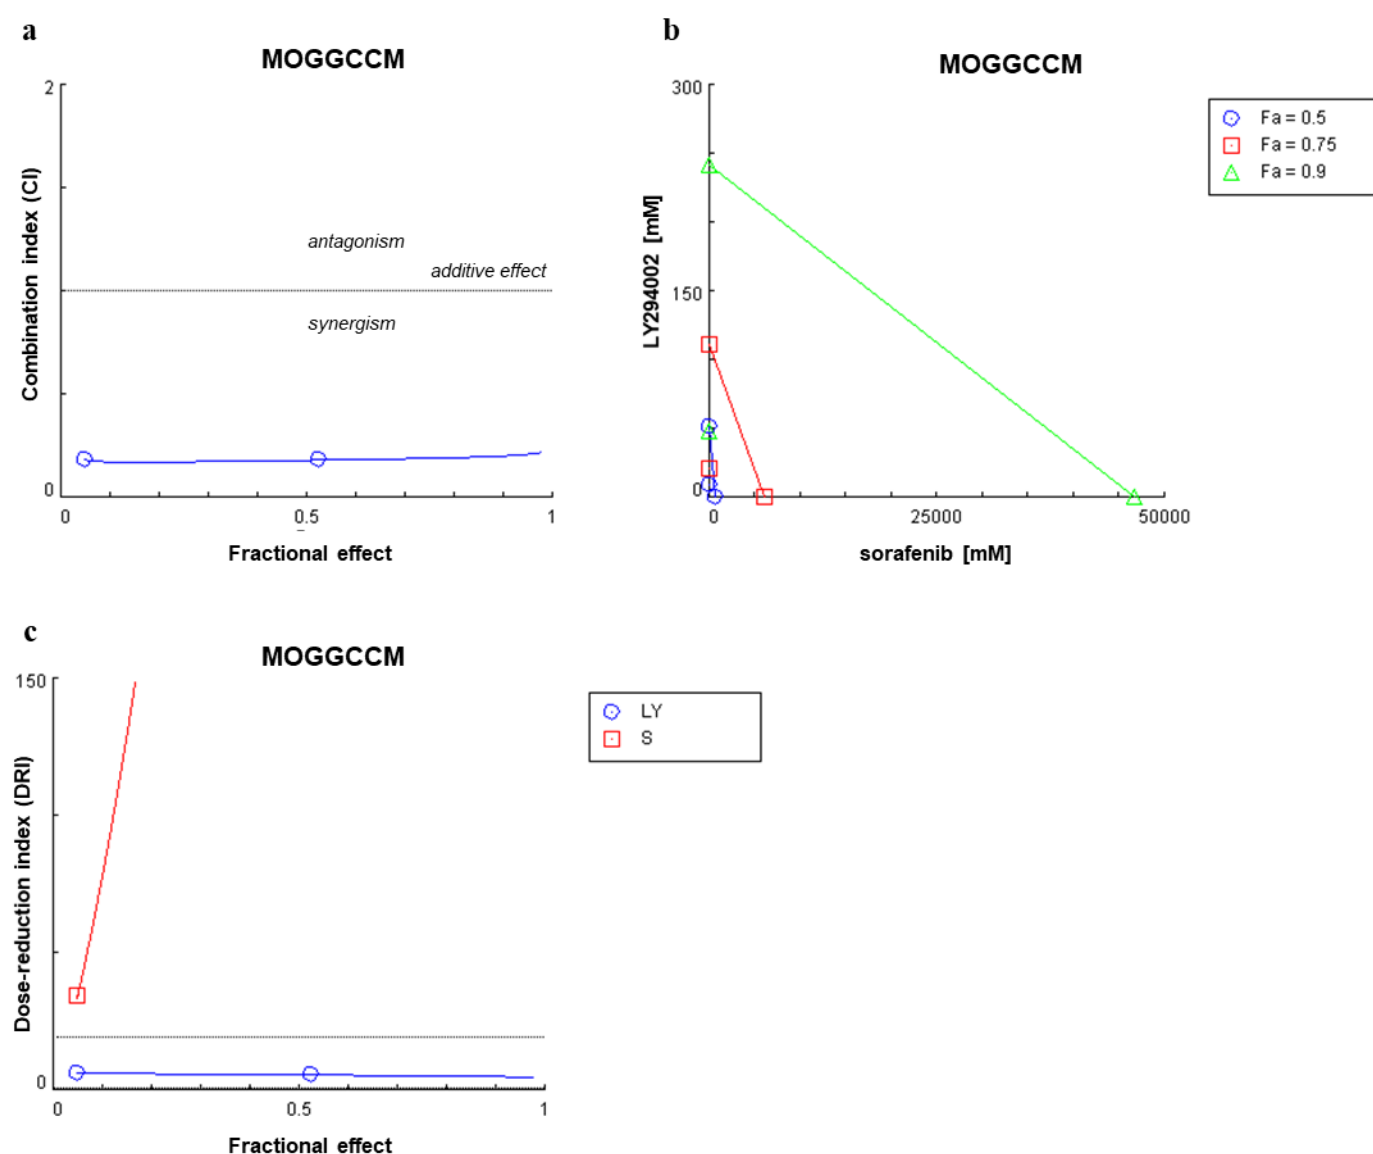

**Fig. 5 A:** LY294002 and sorafenib combination treatment in MOGGCCM cells. (a) Combination index (CI) plot: The combination index is plotted as a function of Fa (fractional effect). (b) Isobologram for combination: Classic isobologram at IC<sub>50</sub>, IC<sub>75</sub>, and IC<sub>90</sub>. (c) the Fa-DRI (dose reduction index) plot (Chou-Martin plot). Combination index (CI) and dose reduction index (DRI) were calculated according to the method of Chou and Talalay using the Compusyn software. CI<1, CI=1 and CI>1 indicate synergistic effect, additive effect, and antagonistic effect, respectively. The DRI represents the fold reduction of LY294002 as a result of synergistic combination compared to the concentration of drug treatment alone needed to reach the same effect. The use of a combination of LY294002 and sorafenib in the MOGGCCM cells line resulted in synergism.

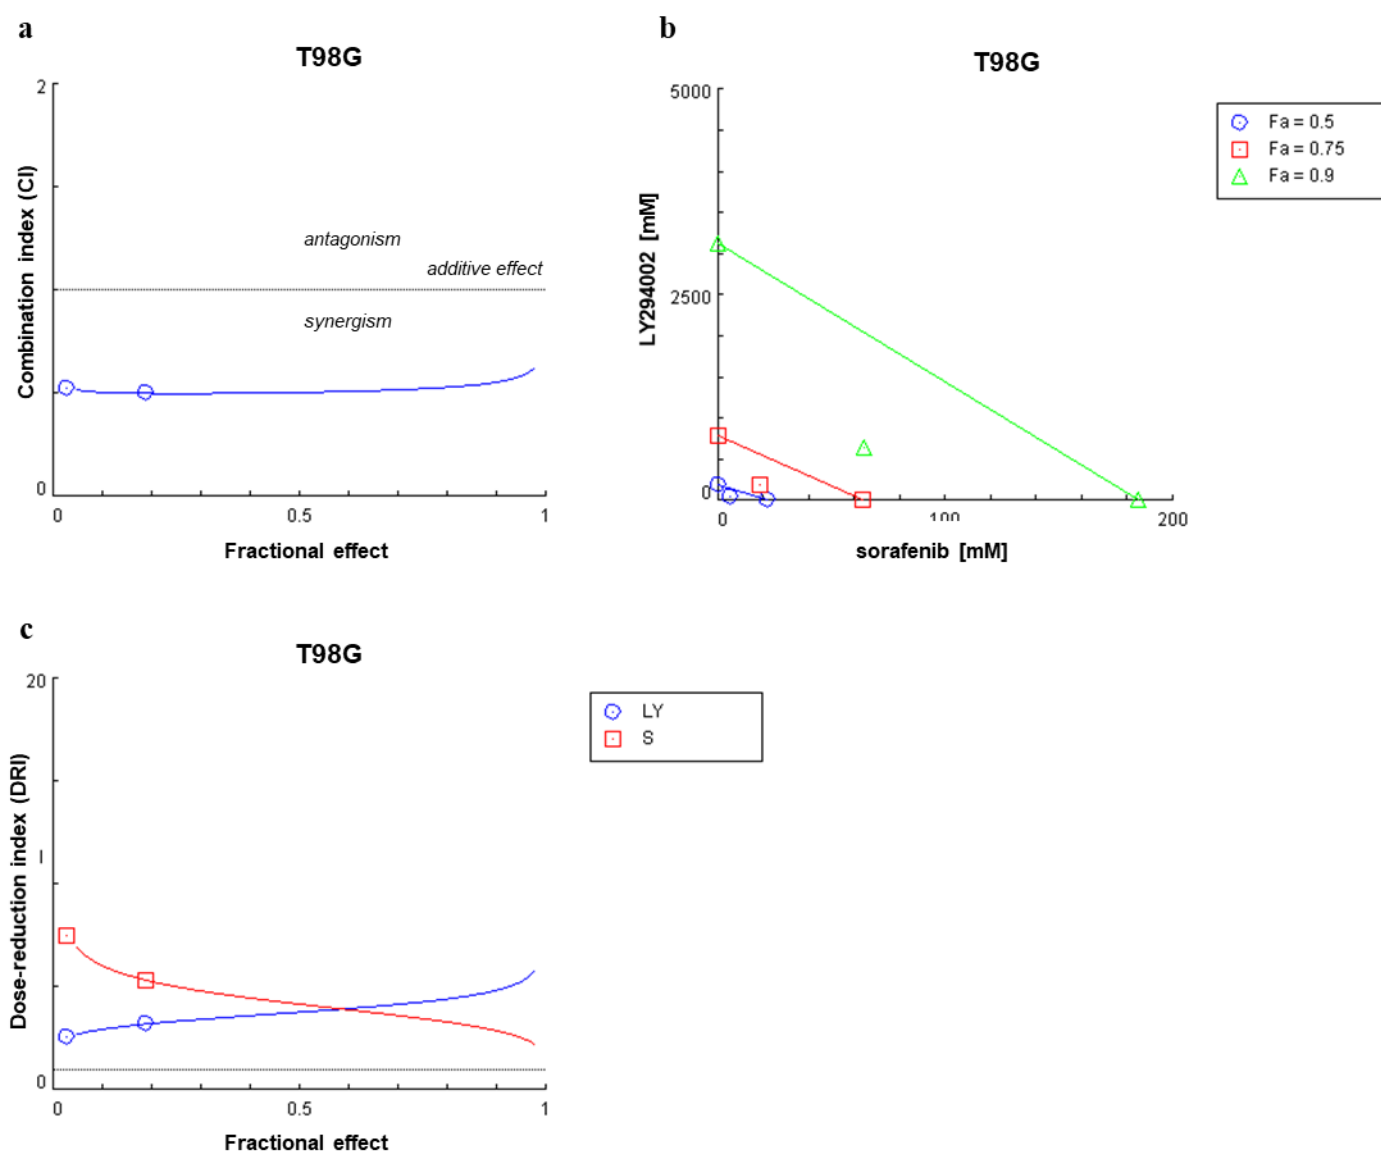

**Fig. 6** LY294002 and sorafenib combination treatment in T98G cells. (a) Combination index (CI) plot: The combination index is plotted as a function of Fa (fractional effect). (b) Isobologram for combination: Classic isobologram at IC<sub>50</sub>, IC<sub>75</sub>, and IC<sub>90</sub>. (c) the Fa-DRI (dose reduction index) plot (Chou-Martin plot). Combination index (CI) and dose reduction index (DRI) were calculated according to the method of Chou and Talalay using the Compusyn software. CI<1, CI=1 and CI>1 indicate synergistic effect, additive effect, and antagonistic effect, respectively. The DRI represents the fold reduction of TMZ as a result of synergistic combination compared to the concentration of drug treatment alone needed to reach the same effect. These results showed the efficacy of LY294002 to improve sorafenib-mediated cytotoxicity by reducing its concentration. Therefore, LY294002 in combination with sorafenib have a synergistic effect on the apoptosis induction of glioma cells.

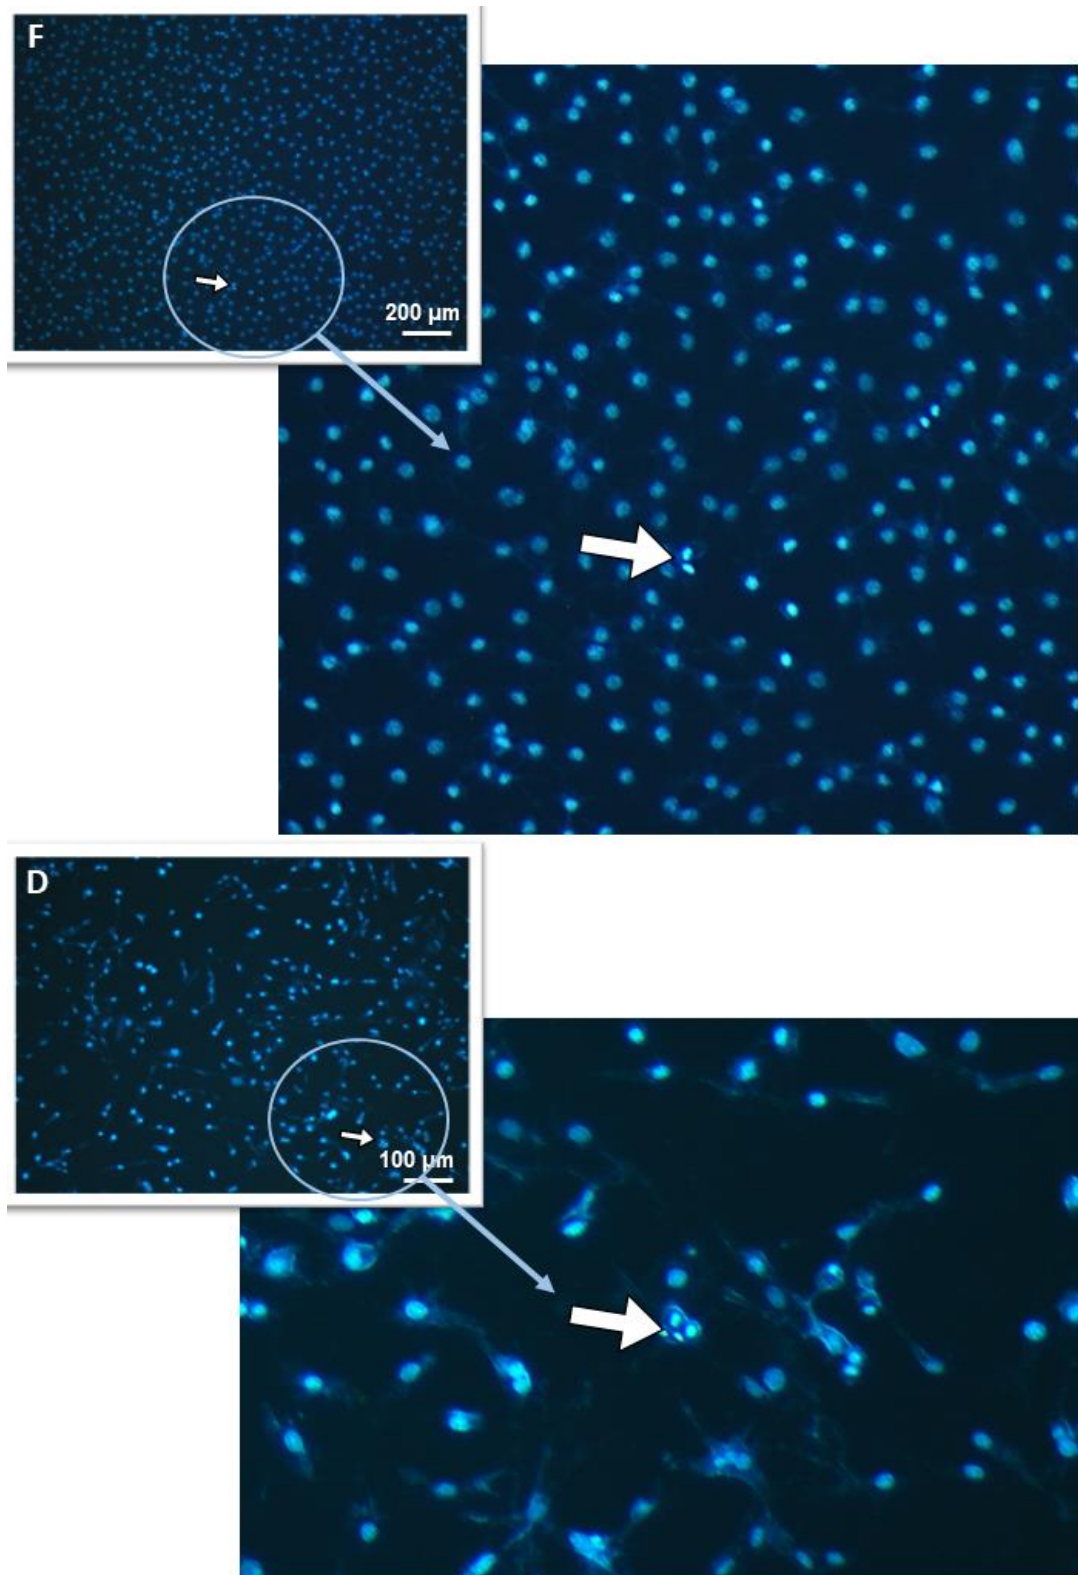

**Fig. 7** Zoomed photos of normal (astrocytes and oligodendrocytes) treated cells for apoptotic bodies visualization increase.
